# Supplementary material
Source: HighWire-hosted journal article supplement (https://bmjopen.bmj.com/content/8/5/e019719)
Supplement: inline-supplementary-material-1 [file inline-supplementary-material-1.pdf]

---

# Appendices

## ***1 Search strategy used in PubMed***

#1 "hypertension"[MeSH Terms] OR "hypertension"[Title/Abstract] OR "high blood pressure"[Title/Abstract] OR "hypertensive"[Title/Abstract] OR "high blood pressures"[Title/Abstract]

#2 "Lovastatin"[Mesh] OR "Mevinolin"[Title/Abstract] OR "Monacolin"[Title/Abstract] OR "6-Methylcompactin"[Title/Abstract] OR "6 Methylcompactin"[Title/Abstract] OR "MK-803"[Title/Abstract] OR "MK 803"[Title/Abstract] OR "MK803"[Title/Abstract] OR "Mevacor"[Title/Abstract] OR "Lovastatin"[Title/Abstract]

#3 "Simvastatin"[Mesh] OR "Synvinolin"[Title/Abstract] OR "MK-733"[Title/Abstract] OR "MK 733"[Title/Abstract] OR "MK733"[Title/Abstract] OR "Zocor"[Title/Abstract] OR "Simvastatin"[Title/Abstract]

#4 "Pravastatin"[Mesh] OR "Eptastatin"[Title/Abstract] OR "Vasten"[Title/Abstract] OR "CS-514"[Title/Abstract] OR "CS 514"[Title/Abstract] OR "CS514"[Title/Abstract] OR "Lipemol"[Title/Abstract] OR "Liplat"[Title/Abstract] OR "Prareduct"[Title/Abstract] OR "Mevalotin"[Title/Abstract] OR "Pravachol"[Title/Abstract] OR "Elisor"[Title/Abstract] OR "Selektine"[Title/Abstract] OR "Lipostat"[Title/Abstract] OR "Pravacol"[Title/Abstract] OR "Pravasin"[Title/Abstract] OR "Pravastatin"[Title/Abstract] OR "RMS-431"[Title/Abstract] OR "RMS 431"[Title/Abstract] OR "RMS431"[Title/Abstract] OR "SQ-31000"[Title/Abstract] OR "SQ 31000"[Title/Abstract] OR "SQ31000"[Title/Abstract] OR "SQ-31,000"[Title/Abstract] OR "SQ 31,000"[Title/Abstract] OR "SQ31,000"[Title/Abstract] OR "Bristacol"[Title/Abstract]

#5 "fluvastatin" [Supplementary Concept] OR "fluindostatin"[Title/Abstract] OR "Lescol"[Title/Abstract] OR "XU 62-320"[Title/Abstract] OR "XU-62320"[Title/Abstract] OR "XU 62320"[Title/Abstract]

#6 "Atorvastatin Calcium"[Mesh] OR "Atorvastatin"[Title/Abstract] OR "CI 981"[Title/Abstract] OR "CI-981"[Title/Abstract] OR "CI981"[Title/Abstract] OR "Lipitor"[Title/Abstract] OR "Liptonorm"[Title/Abstract]

#7 "Rosuvastatin Calcium"[Mesh] OR "Crestor"[Title/Abstract] OR "Rosuvastatin"[Title/Abstract] OR "ZD4522"[Title/Abstract] OR "ZD 4522"[Title/Abstract]

#8 "pitavastatin" [Supplementary Concept] OR "itavastatin"[Title/Abstract] OR "nisvastatin"[Title/Abstract] OR "P 872441"[Title/Abstract] OR "P-872441"[Title/Abstract] OR "pitavastatin"[Title/Abstract] OR "alipza"[Title/Abstract] OR "livalo"[Title/Abstract] OR "livazo"[Title/Abstract] OR "nisvastatin"[Title/Abstract] OR "nk 104"[Title/Abstract] OR "nk104"[Title/Abstract] OR "nks 104"[Title/Abstract] OR "nks104"[Title/Abstract]

---

OR "pitava"[Title/Abstract] OR "ribar"[Title/Abstract] OR  
"vezeptra"[Title/Abstract]

#9 "lipid lowering drugs"[Title/Abstract] OR "lipid lowering agents"[Title/Abstract]  
OR "Lipid-lowering medicine"[Title/Abstract] OR Statin\*[Title/Abstract] OR "lipid  
lowering drug"[Title/Abstract] OR "lipid lowering agent"[Title/Abstract] OR  
"Lipid-lowering medicines"[Title/Abstract]

#10 OR/2-9

#11 "Antihypertensive Agents"[Mesh] OR "Antihypertensives"[Title/Abstract]  
OR "Anti-Hypertensives"[Title/Abstract] OR "Anti Hypertensives"[Title/Abstract]  
OR "Antihypertensive"[Title/Abstract] OR "Anti-Hypertensive"[Title/Abstract]  
OR "Anti Hypertensive"[Title/Abstract]

#12 "Calcium Channel Blockers"[Mesh] OR "Calcium Channel Blockers"  
[Pharmacological Action] OR "Calcium Channel Antagonist"[Title/Abstract] OR  
"Exogenous Calcium Inhibitor"[Title/Abstract] OR "Exogenous Calcium  
Antagonist"[Title/Abstract] OR "Exogenous Calcium Blockader"[Title/Abstract]  
OR "Calcium Antagonist"[Title/Abstract]

#13 "Nifedipine"[Mesh] OR "Bay-1040"[Title/Abstract] OR "Bay  
1040"[Title/Abstract] OR "Bay1040"[Title/Abstract] OR  
"BAY-a-1040"[Title/Abstract] OR "BAY a 1040"[Title/Abstract] OR  
"BAYa1040"[Title/Abstract] OR "Cordipin"[Title/Abstract] OR  
"Cordipine"[Title/Abstract] OR "Corinfar"[Title/Abstract] OR  
"Korinfar"[Title/Abstract] OR "Nifangin"[Title/Abstract] OR  
"Procardia"[Title/Abstract] OR "Vascard"[Title/Abstract] OR  
"Nifedipine"[Title/Abstract] OR "Adalat"[Title/Abstract] OR  
"Fenigidin"[Title/Abstract]

#14 "Amlodipine"[Mesh] OR "Amlodis"[Title/Abstract] OR  
"Astudal"[Title/Abstract] OR "Norvasc"[Title/Abstract] OR "Istin"[Title/Abstract]  
OR "Amlor"[Title/Abstract] OR "Amlodipine"[Title/Abstract]

#15 "levamlodipine" [Supplementary Concept] OR  
"levamlodipine"[Title/Abstract]

#16 "Felodipine"[Mesh] OR "Felo Biochemie"[Title/Abstract] OR  
"Felo-Puren"[Title/Abstract] OR "Felo Puren"[Title/Abstract] OR  
"Felobeta"[Title/Abstract] OR "Felocor"[Title/Abstract] OR  
"Felodipin"[Title/Abstract] OR "Felodipine"[Title/Abstract] OR  
"Felodur"[Title/Abstract] OR "Felogamma"[Title/Abstract] OR  
"Fensel"[Title/Abstract] OR "H 154-82"[Title/Abstract] OR "H 154  
82"[Title/Abstract] OR "H 15482"[Title/Abstract] OR "Perfudal"[Title/Abstract]  
OR "Plendil"[Title/Abstract] OR "Flodil"[Title/Abstract] OR  
"Modip"[Title/Abstract] OR "Renedil"[Title/Abstract] OR  
"Munobal"[Title/Abstract] OR "Agon"[Title/Abstract]

#17 "lacidipine" [Supplementary Concept] OR "Lacipil"[Title/Abstract] OR  
"Lacimen"[Title/Abstract] OR "Caldine"[Title/Abstract] OR  
"Motens"[Title/Abstract] OR "Lacidipine"[Title/Abstract] OR "GR  
43659X"[Title/Abstract] OR "GR-43659X"[Title/Abstract]

---

#18 "Nicardipine"[Mesh] OR "Cardene"[Title/Abstract] OR  
"Vasonase"[Title/Abstract] OR "Antagonil"[Title/Abstract] OR  
"Dagan"[Title/Abstract] OR "Flusemide"[Title/Abstract] OR  
"Lecibral"[Title/Abstract] OR "Lincil"[Title/Abstract] OR "Loxen"[Title/Abstract]  
OR "Lucenfal"[Title/Abstract] OR "Nicardipine"[Title/Abstract] OR  
"Nicardipino"[Title/Abstract] OR "Perdipine"[Title/Abstract] OR  
"Ridene"[Title/Abstract] OR "Y-93"[Title/Abstract] OR "Y 93"[Title/Abstract] OR  
"Y93"[Title/Abstract]

#19 "Nitrendipine"[Mesh] OR "Nitregamma"[Title/Abstract] OR "Nitrend  
KSK"[Title/Abstract] OR "Nitrendepat"[Title/Abstract] OR "Nitren  
acis"[Title/Abstract] OR "Nitrendi Biochemie"[Title/Abstract] OR  
"Nitrendidoc"[Title/Abstract] OR "Nitrendimerck"[Title/Abstract] OR  
"Nitrendipin"[Title/Abstract] OR "nitrendipincorax"[Title/Abstract] OR  
"Nitrendipino"[Title/Abstract] OR "Nitrensal"[Title/Abstract] OR  
"Nitrepres"[Title/Abstract] OR "Tensogradal"[Title/Abstract] OR  
"Trendinol"[Title/Abstract] OR "Vastensium"[Title/Abstract] OR  
"Balminil"[Title/Abstract] OR "Bay e 5009"[Title/Abstract] OR  
"Baypresol"[Title/Abstract] OR "Baypress"[Title/Abstract] OR  
"Bayotensin"[Title/Abstract] OR "Gericin"[Title/Abstract] OR  
"Jutapress"[Title/Abstract] OR "Nidrel"[Title/Abstract] OR  
"Niprina"[Title/Abstract] OR "Nitre AbZ"[Title/Abstract] OR  
"Nitre-Puren"[Title/Abstract] OR "Nitre Puren"[Title/Abstract] OR  
"NitrePuren"[Title/Abstract] OR "Nitren 1A Pharma"[Title/Abstract] OR "Nitren  
Lich"[Title/Abstract]

#20 "cilnidipine" [Supplementary Concept] OR "FRC 8653"[Title/Abstract] OR  
"FRC-8653"[Title/Abstract] OR "cilnidipine"[Title/Abstract]

#21 "manidipine" [Supplementary Concept]

#22 "CV 4093"[Title/Abstract] OR "CV-4093"[Title/Abstract] OR  
"manidipine"[Title/Abstract] OR "Perdipine"[Title/Abstract]

#23 "benidipine" [Supplementary Concept] OR "benidipine"[Title/Abstract]

#24 "lercanidipine" [Supplementary Concept] OR "Zanidip"[Title/Abstract] OR  
"Lerdip"[Title/Abstract] OR "REC 15-2375"[Title/Abstract] OR  
"REC-15-2375"[Title/Abstract] OR "Lercadip"[Title/Abstract] OR  
"lercanidipine"[Title/Abstract]

#25 "Verapamil"[Mesh] OR "Iproveratril"[Title/Abstract] OR  
"Cordilox"[Title/Abstract] OR "Dexverapamil"[Title/Abstract] OR  
"Verapamil"[Title/Abstract] OR "Finoptin"[Title/Abstract] OR  
"Izoptin"[Title/Abstract] OR "Isoptine"[Title/Abstract] OR  
"Lekoptin"[Title/Abstract] OR "Calan"[Title/Abstract] OR  
"Falicard"[Title/Abstract]

#26 "Diltiazem"[Mesh] OR "Cardil"[Title/Abstract] OR "Cardizem"[Title/Abstract]  
OR "CRD-401"[Title/Abstract] OR "CRD 401"[Title/Abstract] OR  
"CRD401"[Title/Abstract] OR "Tiazac"[Title/Abstract] OR "Dilren"[Title/Abstract]  
OR "Dilzem"[Title/Abstract] OR "Aldizem"[Title/Abstract] OR  
"Dilacor"[Title/Abstract] OR "Diltiazem"[Title/Abstract]

---

#27 OR/11-26

#28 "Angiotensin-Converting Enzyme Inhibitors"[Mesh] OR  
"Angiotensin-Converting Enzyme Inhibitors" [Pharmacological Action] OR  
"Angiotensin Converting Enzyme Inhibitor"[Title/Abstract] OR "Kininase II  
Antagonists"[Title/Abstract] OR "Kininase II Inhibitors"[Title/Abstract] OR  
"Angiotensin I-Converting Enzyme Inhibitor"[Title/Abstract] OR "Angiotensin I  
Converting Enzyme Inhibitor"[Title/Abstract] OR "ACE Inhibitors"[Title/Abstract]  
OR "Angiotensin-Converting Enzyme Antagonist"[Title/Abstract] OR  
"Angiotensin Converting Enzyme Antagonist"[Title/Abstract] OR  
"ACEI"[Title/Abstract]

#29 "Captopril"[Mesh] OR "Tensiomin"[Title/Abstract] OR  
"Lopirin"[Title/Abstract] OR "SQ-14,534"[Title/Abstract] OR "SQ  
14,534"[Title/Abstract] OR "SQ14,534"[Title/Abstract] OR  
"SQ-14534"[Title/Abstract] OR "SQ 14534"[Title/Abstract] OR  
"SQ14534"[Title/Abstract] OR "Capoten"[Title/Abstract] OR  
"SQ-14,225"[Title/Abstract] OR "SQ 14,225"[Title/Abstract] OR "  
SQ14,225"[Title/Abstract] OR "SQ-14225"[Title/Abstract] OR "SQ  
14225"[Title/Abstract] OR "SQ14225"[Title/Abstract] OR  
"Captopril"[Title/Abstract]

#30 "Enalapril"[Mesh] OR "MK-421"[Title/Abstract] OR "MK 421"[Title/Abstract]  
OR "MK421"[Title/Abstract] OR "Renitec"[Title/Abstract] OR  
"Renitek"[Title/Abstract] OR "Enalapril"[Title/Abstract]

#31 "benazepril" [Supplementary Concept] OR "benazapril"[Title/Abstract] OR  
"benzazepril"[Title/Abstract] OR "Labopal"[Title/Abstract] OR  
"Lotensin"[Title/Abstract] OR "Cibacène"[Title/Abstract] OR  
"Cibacen"[Title/Abstract] OR "Briem"[Title/Abstract] OR  
"CGS-14824-A"[Title/Abstract] OR "CGS-14824A"[Title/Abstract]

#32 "imidapril"[Supplementary Concept] OR "Tanatril"[Title/Abstract] OR "TA  
6366"[Title/Abstract] OR "TA-6366"[Title/Abstract] OR "imidapri"[Title/Abstract]

#33 "lisinopril"[Title/Abstract] OR "Acerbon"[Title/Abstract] OR  
"Carace"[Title/Abstract] OR "Liprene"[Title/Abstract] OR "Prinivil"[Title/Abstract]  
OR "Prinizil"[Title/Abstract] OR "Tersil"[Title/Abstract]

#34 "Perindopril"[Mesh] OR "Pirindopril"[Title/Abstract] OR  
"S-9490"[Title/Abstract] OR "S 9490"[Title/Abstract] OR "S9490"[Title/Abstract]  
OR "S 9490-3"[Title/Abstract] OR "S 9490 3"[Title/Abstract] OR "S  
94903"[Title/Abstract] OR "Perindopril"[Title/Abstract] OR  
"Perstarium"[Title/Abstract]

#35 "Ramipril"[Mesh] OR "Vesdil"[Title/Abstract] OR "Triatec"[Title/Abstract]  
OR "Altace"[Title/Abstract] OR "Zabien"[Title/Abstract] OR  
"Ramace"[Title/Abstract] OR "Tritace"[Title/Abstract] OR "Acovil"[Title/Abstract]  
OR "Delix"[Title/Abstract] OR "Carasel"[Title/Abstract] OR  
"HOE-498"[Title/Abstract] OR "HOE 498"[Title/Abstract] OR  
"HOE498"[Title/Abstract] OR "Ramipril"[Title/Abstract]

#36 "trandolapril" [Supplementary Concept] OR "trandolapril"[Title/Abstract]  
OR "Udrik"[Title/Abstract] OR "RU 44570"[Title/Abstract] OR

---

"RU44570"[Title/Abstract] OR "RU-44570"[Title/Abstract] OR  
"Mavik"[Title/Abstract] OR "Gopten"[Title/Abstract]

#37 "Cilazapril"[Mesh] OR "Inhibace"[Title/Abstract] OR "Ro  
31-2848"[Title/Abstract] OR "Ro 31 2848"[Title/Abstract] OR "Ro  
312848"[Title/Abstract] OR "Ro-31-2848"[Title/Abstract] OR  
"Ro312848"[Title/Abstract] OR "Cilazapril"[Title/Abstract]

#38 "Fosinopril"[Mesh] OR "Fosinil"[Title/Abstract] OR "Fositens"[Title/Abstract]  
OR "Tenso Stop"[Title/Abstract] OR "Tensocardil"[Title/Abstract] OR  
"Fozitec"[Title/Abstract] OR "Hiperlex"[Title/Abstract] OR  
"Monopril"[Title/Abstract] OR "Fosinorm"[Title/Abstract] OR  
"Newace"[Title/Abstract] OR "Staril"[Title/Abstract] OR  
"SQ-28,555"[Title/Abstract] OR "SQ 28,555"[Title/Abstract] OR  
"SQ28,555"[Title/Abstract] OR "SQ-28555"[Title/Abstract] OR "SQ  
28555"[Title/Abstract] OR "SQ28555"[Title/Abstract] OR  
"Dynacil"[Title/Abstract]

#39 OR/28-38

#40 "Angiotensin Receptor Antagonists"[Mesh] OR "Angiotensin Receptor  
Antagonists" [Pharmacological Action] OR "Angiotensin II Type 1 Receptor  
Blockers"[Mesh] OR "Angiotensin II Type 2 Receptor Blockers"[Mesh] OR  
"Angiotensin Receptor Blocker"[Title/Abstract] OR "Angiotensin Receptor  
Antagonist"[Title/Abstract] OR "Angiotensin II Receptor  
Antagonist"[Title/Abstract] OR "Angiotensin II Receptor Blocker"[Title/Abstract]

#41 "Losartan"[Mesh] OR "DuP-753"[Title/Abstract] OR "DuP  
753"[Title/Abstract] OR "DuP753"[Title/Abstract] OR "MK-954"[Title/Abstract]  
OR "MK 954"[Title/Abstract] OR "MK954"[Title/Abstract] OR  
"Cozaar"[Title/Abstract] OR "Losartan"[Title/Abstract]

#42 "Valsartan"[Mesh] OR "Diovan"[Title/Abstract] OR  
"Kalpress"[Title/Abstract] OR "Tareg"[Title/Abstract] OR "Nisis"[Title/Abstract]  
OR "Provas"[Title/Abstract] OR "Vals"[Title/Abstract] OR "CGP  
48933"[Title/Abstract] OR "48933, CGP"[Title/Abstract] OR  
"Miten"[Title/Abstract] OR "Valsartan"[Title/Abstract]

#43 "irbesartan" [Supplementary Concept] OR "SR 47436"[Title/Abstract] OR  
"SR-47436"[Title/Abstract] OR "BMS 186295"[Title/Abstract] OR  
"BMS-186295"[Title/Abstract] OR "Avapro"[Title/Abstract] OR  
"Karvea"[Title/Abstract] OR "Aprovel"[Title/Abstract] OR  
"irbesartan"[Title/Abstract]

#44 "telmisartan" [Supplementary Concept] OR "Pritor"[Title/Abstract] OR  
"BIBR 277"[Title/Abstract] OR "BIBR-277"[Title/Abstract] OR  
"Micardis"[Title/Abstract] OR "telmisartan"[Title/Abstract]

#45 "candesartan" [Supplementary Concept] OR "CV 11974"[Title/Abstract]  
OR "CV11974"[Title/Abstract] OR "CV-11974"[Title/Abstract] OR  
"candesartan"[Title/Abstract]

---

#46 "olmesartan" [Supplementary Concept] OR "Olmesartan Medoxomil"[Mesh]  
OR "Olmesartan"[Title/Abstract] OR "Benicar"[Title/Abstract] OR  
"Olmetec"[Title/Abstract] OR "CS 866"[Title/Abstract] OR  
"CS-866"[Title/Abstract] OR "Votum"[Title/Abstract] OR  
"omesartan"[Title/Abstract] OR "RNH 6270"[Title/Abstract] OR  
"CS-088"[Title/Abstract]

#47 "eprosartan" [Supplementary Concept] OR "Teveten"[Title/Abstract] OR  
"SK and F 108566"[Title/Abstract] OR "SKF-108566"[Title/Abstract] OR  
"eprosartan"[Title/Abstract]

#48 "allisartan isoproxil" [Supplementary Concept] OR  
"allisartan"[Title/Abstract] OR "ALS-3 compound"[Title/Abstract]

#49 "azilsartan" [Supplementary Concept] OR "azilsartan medoxomil"  
[Supplementary Concept] OR "TAK-536"[Title/Abstract] OR "TAK  
491"[Title/Abstract] OR "TAK491"[Title/Abstract] OR "TAK-491"[Title/Abstract]  
OR "azilsartan"[Title/Abstract]

#50 OR/40-49

#51 "Diuretics"[Mesh] OR "Diuretics" [Pharmacological Action] OR  
"Diuretics"[Title/Abstract]

#52 "Hydrochlorothiazide"[Mesh] OR "HCTZ"[Title/Abstract] OR  
"Dichlothiazide"[Title/Abstract] OR "Dihydrochlorothiazide"[Title/Abstract] OR  
"HydroDIURIL"[Title/Abstract] OR "Oretic"[Title/Abstract] OR  
"Sectrazide"[Title/Abstract] OR "Esidrix"[Title/Abstract] OR  
"Esidrex"[Title/Abstract] OR "Hypothiazide"[Title/Abstract]

#53 "Bendroflumethiazide"[Mesh] OR "Bendrofluazide"[Title/Abstract] OR  
"Benzide"[Title/Abstract] OR "Berkozide"[Title/Abstract] OR  
"Urizid"[Title/Abstract] OR "Esberizid"[Title/Abstract] OR  
"Naturetin"[Title/Abstract] OR "Neo-NaClex"[Title/Abstract] OR "Neo  
NaClex"[Title/Abstract] OR "NeoNaClex"[Title/Abstract] OR  
"Aprinox"[Title/Abstract] OR "Centyl"[Title/Abstract] OR "Pluryl"[Title/Abstract]  
OR "Naturine"[Title/Abstract]

#54 "Indapamide"[Mesh] OR "Metindamide"[Title/Abstract] OR  
"S-1520"[Title/Abstract] OR "S 1520"[Title/Abstract] OR "S1520"[Title/Abstract]  
OR "SE-1520"[Title/Abstract] OR "SE 1520"[Title/Abstract] OR  
"SE1520"[Title/Abstract] OR "Indapamide"[Title/Abstract]

#55 "Chlorthalidone"[Mesh] OR "Chlorphthalidolone"[Title/Abstract] OR  
"Phthalamudine"[Title/Abstract] OR "Oxodoline"[Title/Abstract] OR  
"Chlortalidone"[Title/Abstract] OR "Hygroton"[Title/Abstract] OR  
"Thalitone"[Title/Abstract]

#56 "Furosemide"[Mesh] OR "Frusemide"[Title/Abstract] OR  
"Fursemide"[Title/Abstract] OR "Frusemid"[Title/Abstract] OR  
"Fusid"[Title/Abstract] OR "Lasix"[Title/Abstract] OR  
"Furosemide"[Title/Abstract] OR "Errolon"[Title/Abstract] OR  
"Furanthril"[Title/Abstract] OR "Furantral"[Title/Abstract]

---

#57 "torsemide" [Supplementary Concept] OR "torasemide"[Title/Abstract] OR "Demadex"[Title/Abstract]

#58 "Amiloride"[Mesh] OR "Amiduret Trom"[Title/Abstract] OR "Amiloberag"[Title/Abstract] OR "Midoride"[Title/Abstract] OR "Kaluril"[Title/Abstract] OR "Midamor"[Title/Abstract] OR "Modamide"[Title/Abstract] OR "Amidal"[Title/Abstract]

#59 "Triamterene"[Mesh] OR "Urocaudal"[Title/Abstract] OR "Dyrenium"[Title/Abstract] OR "Dytac"[Title/Abstract]

#60 "Spironolactone"[Mesh] OR "Spirolactone"[Title/Abstract] OR "Veroshpiron"[Title/Abstract] OR "Verospirone"[Title/Abstract] OR "Spiractin"[Title/Abstract] OR "Spironolactone"[Title/Abstract] OR "Spirobeta"[Title/Abstract] OR "Spirogamma"[Title/Abstract] OR "Spirolang"[Title/Abstract] OR "Spiro-no-Isis"[Title/Abstract] OR "Spiro-no-Isis"[Title/Abstract] OR "Spironone"[Title/Abstract] OR "Spirospare"[Title/Abstract] OR "Verospiron"[Title/Abstract] OR "Aldactone"[Title/Abstract] OR "Aldactone A"[Title/Abstract] OR "Aquareduct"[Title/Abstract] OR "duraspiron"[Title/Abstract] OR "Flumach"[Title/Abstract] OR "Frumikal"[Title/Abstract] OR "Jenaspiron"[Title/Abstract] OR "Novo-Spiroton"[Title/Abstract] OR "Novo Spiroton"[Title/Abstract] OR "NovoSpiroton"[Title/Abstract] OR "Practon"[Title/Abstract] OR "SC-9420"[Title/Abstract] OR "SC 9420"[Title/Abstract] OR "SC9420"[Title/Abstract] OR "Spiro L.U.T." [Title/Abstract]

#61 "eplerenone" [Supplementary Concept] OR "eplerenone"[Title/Abstract] OR "eplerenon"[Title/Abstract] OR "Inspra"[Title/Abstract]

#62 OR/51-61

#63 "Adrenergic beta-Antagonists"[Mesh] OR "Adrenergic beta-Antagonists" [Pharmacological Action] OR "Adrenergic beta Antagonists"[Title/Abstract] OR "beta-Adrenergic Receptor Blockaders"[Title/Abstract] OR "beta Adrenergic Receptor Blockaders"[Title/Abstract] OR "beta-Adrenergic Blockers"[Title/Abstract] OR "beta Adrenergic Blockers"[Title/Abstract] OR "Adrenergic beta-Blockers"[Title/Abstract] OR "Adrenergic beta-Receptor Blockaders"[Title/Abstract] OR "Adrenergic beta Receptor Blockaders"[Title/Abstract] OR "beta-Adrenergic Blocking Agents"[Title/Abstract] OR "beta Adrenergic Blocking Agents"[Title/Abstract]

#64 "Propranolol"[Mesh] OR "Propanolol"[Title/Abstract] OR "Inderal"[Title/Abstract] OR "Avlocardyl"[Title/Abstract] OR "AY-20694"[Title/Abstract] OR "AY 20694"[Title/Abstract] OR "AY20694"[Title/Abstract] OR "Rexigen"[Title/Abstract] OR "Dexpropranolol"[Title/Abstract] OR "Dociton"[Title/Abstract] OR "Obsidan"[Title/Abstract] OR "Obzidan"[Title/Abstract] OR "Anaprilin"[Title/Abstract] OR "Anapriline"[Title/Abstract] OR "Betadren"[Title/Abstract]

#65 "Atenolol"[Mesh] OR "Tenormine"[Title/Abstract] OR "Tenormin"[Title/Abstract] OR "ICI-66082"[Title/Abstract] OR "ICI

---

66082"[Title/Abstract] OR "ICI66082"[Title/Abstract] OR " Atenolol  
"[Title/Abstract]

#66 "Metoprolol"[Mesh] OR "Betalog"[Title/Abstract] OR  
"CGP-2175"[Title/Abstract] OR "CGP 2175"[Title/Abstract] OR  
"CGP2175"[Title/Abstract] OR "H 93-26"[Title/Abstract] OR "H 93  
26"[Title/Abstract] OR "H 9326"[Title/Abstract] OR "pressor"[Title/Abstract] OR  
"Beloc-Duriles"[Title/Abstract] OR "Beloc Duriles"[Title/Abstract] OR  
"BelocDuriles"[Title/Abstract] OR "Seloken"[Title/Abstract] OR  
"Spesicor"[Title/Abstract] OR "Spesikor"[Title/Abstract] OR  
"Metoprolol"[Title/Abstract] OR "Toprol-XL"[Title/Abstract] OR "Toprol  
XL"[Title/Abstract] OR "ToprolXL"[Title/Abstract] OR "Toprol"[Title/Abstract]  
OR "Betoloc"[Title/Abstract]

#67 "Bisoprolol"[Mesh] OR "CL-297939"[Title/Abstract] OR "CL  
297939"[Title/Abstract] OR "CL297939"[Title/Abstract] OR  
"Concor"[Title/Abstract] OR "EMD-33512"[Title/Abstract] OR "EMD  
33512"[Title/Abstract] OR "EMD33512"[Title/Abstract] OR  
"Bisoprolol"[Title/Abstract]

#68 "Betaxolol"[Mesh] OR "Betaxolol"[Title/Abstract] OR  
"Kerlone"[Title/Abstract] OR "Oxodal"[Title/Abstract] OR "Kerlon"[Title/Abstract]  
OR "SL-75212"[Title/Abstract] OR "SL 75212"[Title/Abstract] OR  
"SL75212"[Title/Abstract] OR "ALO-1401-02"[Title/Abstract] OR "

ALO 1401 02"[Title/Abstract] OR "ALO140102"[Title/Abstract] OR  
"Betoptic"[Title/Abstract] OR "Betoptima"[Title/Abstract]

#69 "Sotalol"[Mesh] OR "Sotalol"[Title/Abstract] OR "MJ-1999"[Title/Abstract]  
OR "MJ 1999"[Title/Abstract] OR "MJ1999"[Title/Abstract] OR  
"Darob"[Title/Abstract]

#70 "Nebivolol"[Mesh] OR "Bystolic"[Title/Abstract] OR  
"Nebilet"[Title/Abstract] OR "Silostar"[Title/Abstract] OR  
"Nebivolol"[Title/Abstract] OR "R 67555"[Title/Abstract] OR  
"R-67555"[Title/Abstract] OR "R67555"[Title/Abstract] OR  
"Lobivon"[Title/Abstract]

#71 OR/63-70

#72 "Adrenergic alpha-Antagonists" [Pharmacological Action] OR  
"Adrenergic alpha-Antagonists"[Mesh] OR "Adrenergic alpha  
Antagonists"[Title/Abstract] OR "Adrenergic alpha-Receptor  
Blockaders"[Title/Abstract] OR "Adrenergic alpha Receptor  
Blockaders"[Title/Abstract] OR "alpha-Receptor Blockaders,  
Adrenergic"[Title/Abstract] OR "alpha-Adrenergic Blocking  
Agents"[Title/Abstract] OR "alpha Adrenergic Blocking Agents"[Title/Abstract]  
OR "alpha-Adrenergic Blockers"[Title/Abstract] OR "alpha Adrenergic  
Blockers"[Title/Abstract] OR "alpha-Adrenergic Receptor  
Blockaders"[Title/Abstract] OR "alpha Adrenergic Receptor  
Blockaders"[Title/Abstract] OR "Adrenergic alpha-Blockers"[Title/Abstract] OR  
"Adrenergic alpha Blockers"[Title/Abstract]



---

#73 "Doxazosin"[Mesh] OR "Uriduct"[Title/Abstract] OR  
"Alfamedin"[Title/Abstract] OR "Cardura"[Title/Abstract] OR  
"Zoxan"[Title/Abstract] OR "Carduran"[Title/Abstract] OR  
"Cardular"[Title/Abstract] OR "Diblocin"[Title/Abstract] OR  
"Doxa-Puren"[Title/Abstract] OR "Doxa Puren"[Title/Abstract] OR  
"Doxacor"[Title/Abstract] OR "DoxaUro"[Title/Abstract] OR  
"Doxagamma"[Title/Abstract] OR "Doxamax"[Title/Abstract] OR  
"Doxatensa"[Title/Abstract] OR "Doxazomerck"[Title/Abstract] OR  
"Doxazosin"[Title/Abstract] OR "Jutalar"[Title/Abstract] OR "Progandol  
Neo"[Title/Abstract] OR "UK-33274"[Title/Abstract] OR "UK  
33274"[Title/Abstract] OR "UK33274"[Title/Abstract]

#74 "Prazosin"[Mesh] OR "Furazosin"[Title/Abstract] OR  
"Prazosin"[Title/Abstract] OR "Minipress"[Title/Abstract] OR  
"Pratsiol"[Title/Abstract]

#75 "Terazosin" [Supplementary Concept] OR "Adecurel"[Title/Abstract] OR  
"Terazosin"[Title/Abstract] OR "Dysalfa"[Title/Abstract] OR  
"Hytrin"[Title/Abstract] OR "Deflox"[Title/Abstract] OR "Heitrin"[Title/Abstract]  
OR "Flotrin"[Title/Abstract] OR "Hytrine"[Title/Abstract] OR "Hytrin  
BPH"[Title/Abstract] OR "Magnurol"[Title/Abstract] OR "Sutif"[Title/Abstract]  
OR "Tazusin"[Title/Abstract] OR "Terazoflo"[Title/Abstract] OR  
"Zayasel"[Title/Abstract] OR "A 45975"[Title/Abstract]

#77 OR/72-75

#78 OR/27,39,50,62,71,77

#79 #10 AND #78

#80 "amlodipine, atorvastatin drug combination" [Supplementary Concept] OR  
"amlodipine - atorvastatin"[Title/Abstract] OR "Caduet"[Title/Abstract]

#81 "Atorvastatin Calcium"[Mesh] OR "Atorvastatin"[Title/Abstract] OR "CI  
981"[Title/Abstract] OR "CI-981"[Title/Abstract] OR "CI981"[Title/Abstract] OR  
"Lipitor"[Title/Abstract] OR "Liptonorm"[Title/Abstract]

#82 "Amlodipine"[Mesh] OR "Amlodis"[Title/Abstract] OR  
"Astudal"[Title/Abstract] OR "Norvasc"[Title/Abstract] OR "Istin"[Title/Abstract]  
OR "Amlor"[Title/Abstract] OR "Amlodipine"[Title/Abstract]

#83 #81 AND #82

#84 #80 OR #83

#85 #79 OR #84

#86 #1 AND #85

#87 "Clinical Trials, Phase II as Topic"[Mesh] OR "Clinical Trials, Phase III as  
Topic"[Mesh] OR "Clinical Trials, Phase IV as Topic"[Mesh] OR "Controlled  
Clinical Trials as Topic"[Mesh] OR "Randomized Controlled Trials as  
Topic"[Mesh] OR "Intention to Treat Analysis"[Mesh] OR "Pragmatic Clinical  
Trials as Topic"[Mesh] OR "Clinical Trials, Phase II"[Publication Type] OR  
"Clinical Trials, Phase III"[Publication Type] OR "Clinical Trials, Phase  
IV"[Publication Type] OR "Controlled Clinical Trials"[Publication Type] OR  
"Randomized Controlled Trials"[Publication Type] OR "Pragmatic Clinical Trials

---

as Topic"[Publication Type] OR "Single-Blind Method"[Mesh] OR "Double-Blind Method"[Mesh]

#88 random\*[Title/Abstract] OR blind\*[Title/Abstract] OR  
singleblind\*[Title/Abstract] OR doubleblind\*[Title/Abstract] OR  
trebleblind\*[Title/Abstract] OR tripleblind\*[Title/Abstract]

#89 #87 OR #88

#90 #86 AND #89
